# Supplementary material for: UHRF1 is a novel molecular marker for diagnosis and the prognosis of bladder cancer
Source: PubMed Central journal article supplement (PMC2713709; doi:10.1038/sj.bjc.6605123), 2009-06-02
Supplement: 6605123x2.pdf [file 6605123x2.pdf]

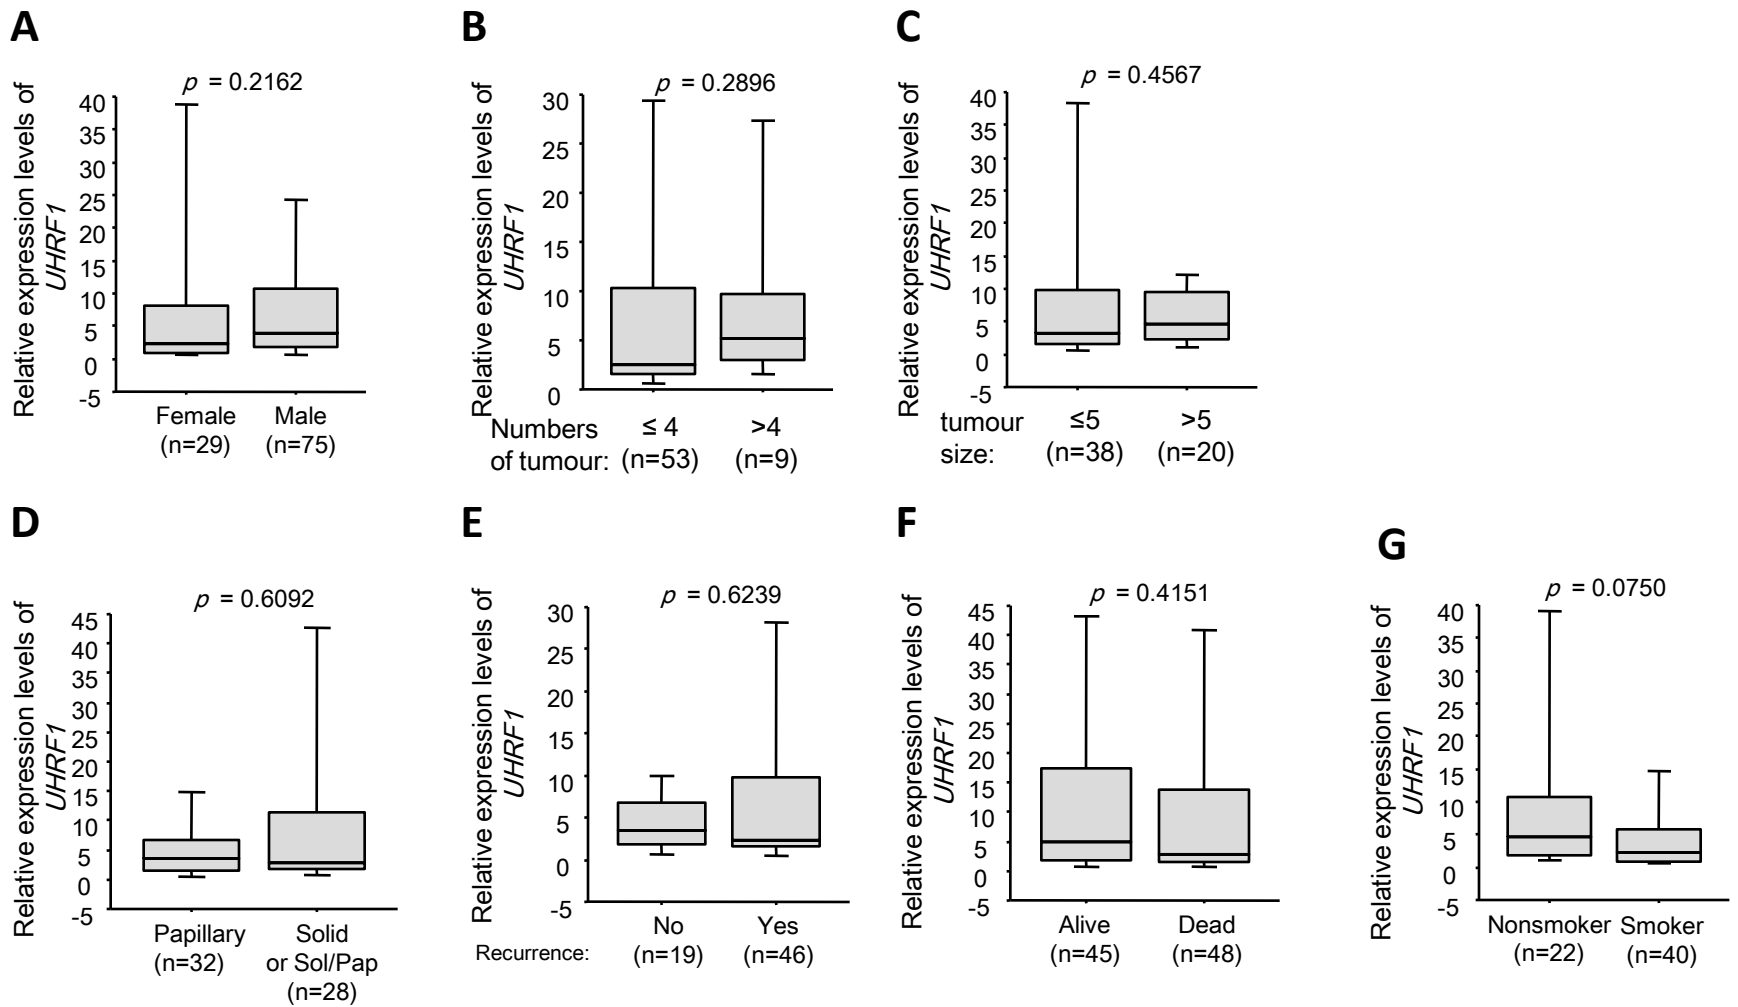

**Supplemental Figure 1** Expression of *UHRF1* detected by TaqMan qRT-PCR and many characteristics of patients were compared by Mann-Whitney's U-test. **A.** Expression levels of *UHRF1* in female patients (n=29) and male patients (n=75). Gender was not associated with expression levels of *UHRF1* ( $p=0.2162$ ). **B.** Expression levels of *UHRF1* in patients with tumours four and less (n=53) and more than four (n=9) were not different ( $p=0.2896$ ). **C.** Expression levels of *UHRF1* in patients with  $\leq 5$  cm tumours (n=38) and with  $>5$  cm tumours (n=20) were not different ( $p=0.4567$ ). **D.** Expression levels of *UHRF1* in patients with papillary type tumours (n=32) and with solid or solid/papillary tumours (n=28) were not different ( $p=0.4567$ ). **E.** Expression levels of *UHRF1* in patients who did not have a recurrence (n=19) and have a recurrence (n=46) were not different ( $p=0.6239$ ). **F.** Expression levels of *UHRF1* in patients who survived 5 years after surgery (n=45) and died within 5 years (n=48) were not different ( $p=0.4151$ ). **G.** Expression levels of *UHRF1* in non-smoker patients (n=22) and smoker patients including 4 ex-smokers (n=40) was not different ( $p=0.0750$ ).  $\beta 2$ -microglobulin was used for normalization.

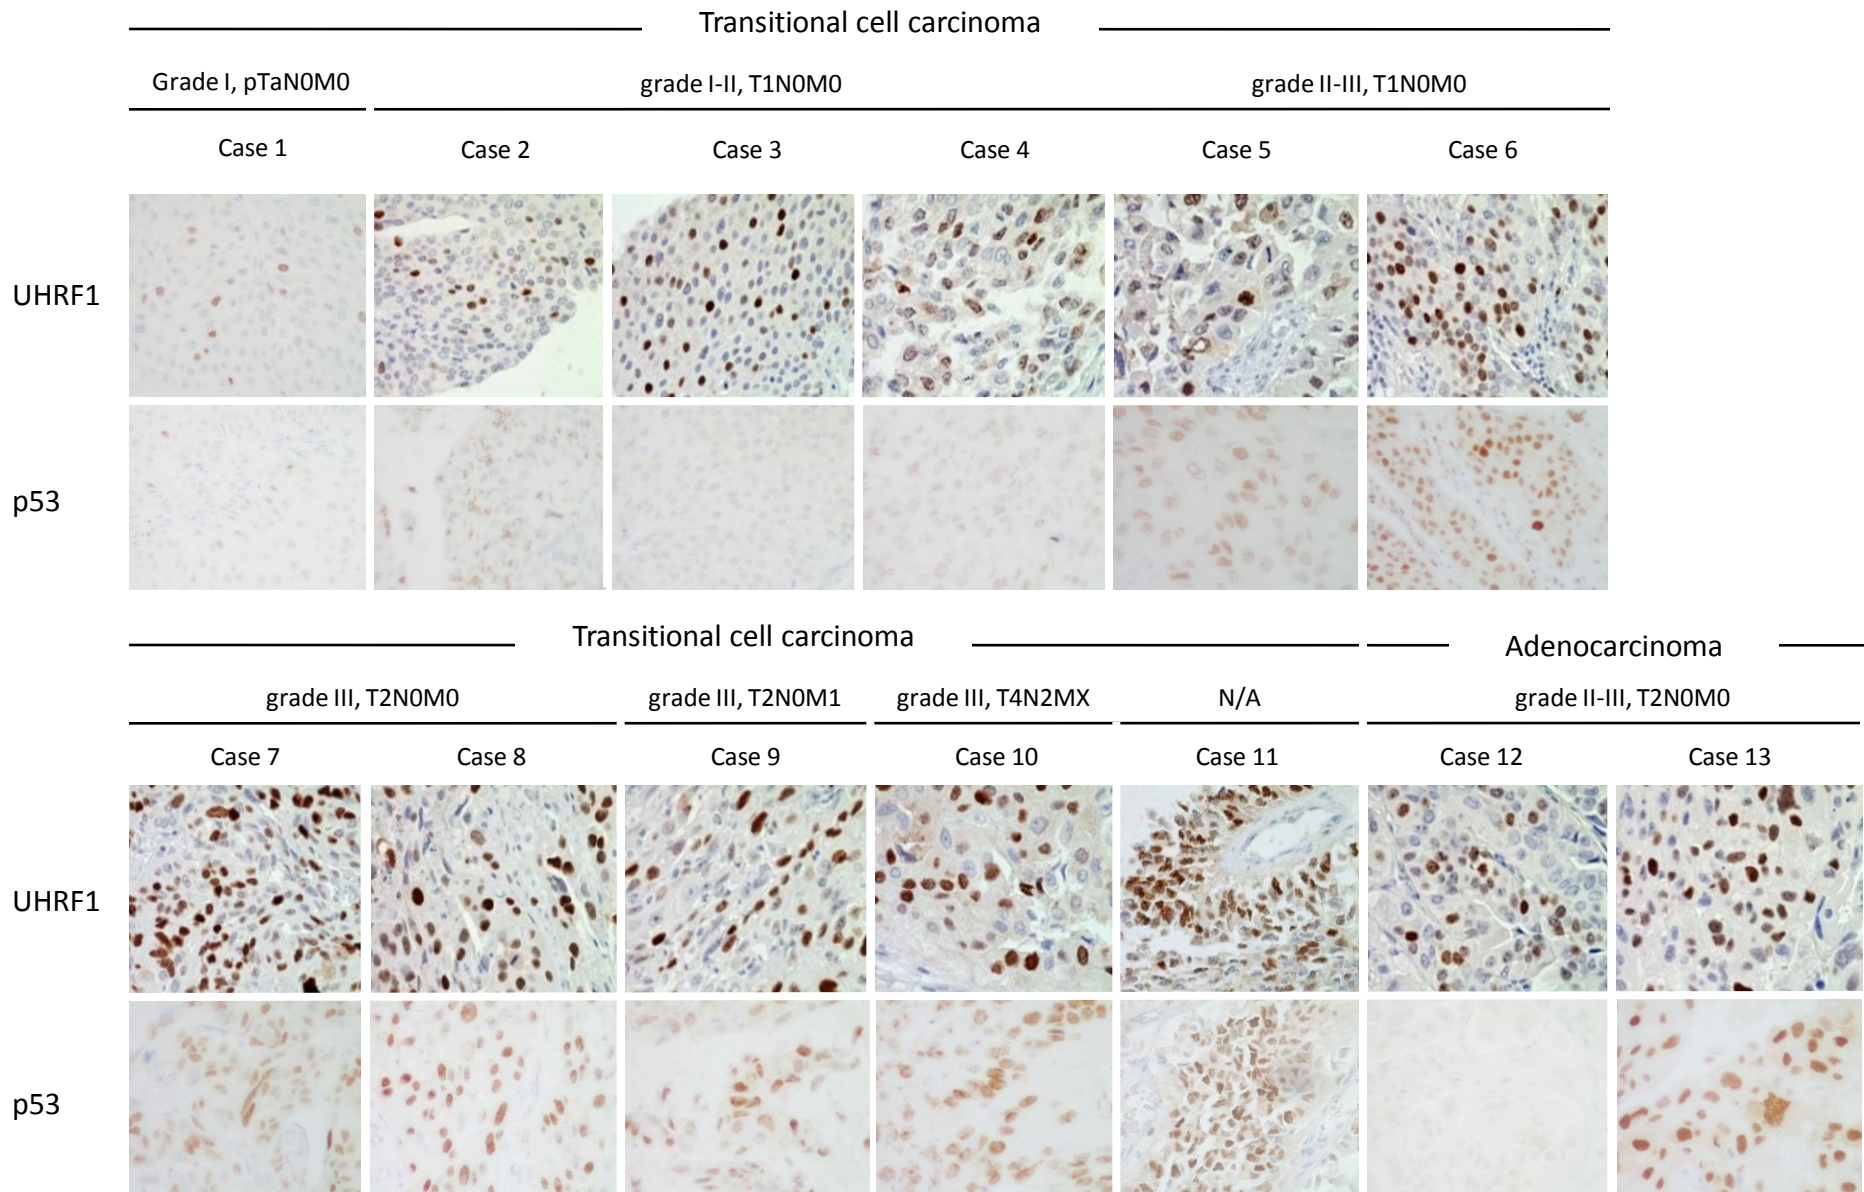

**Supplemental Figure 2** Expression of p53 and UHRF1 in bladder cancers detected by immunohistochemistry.

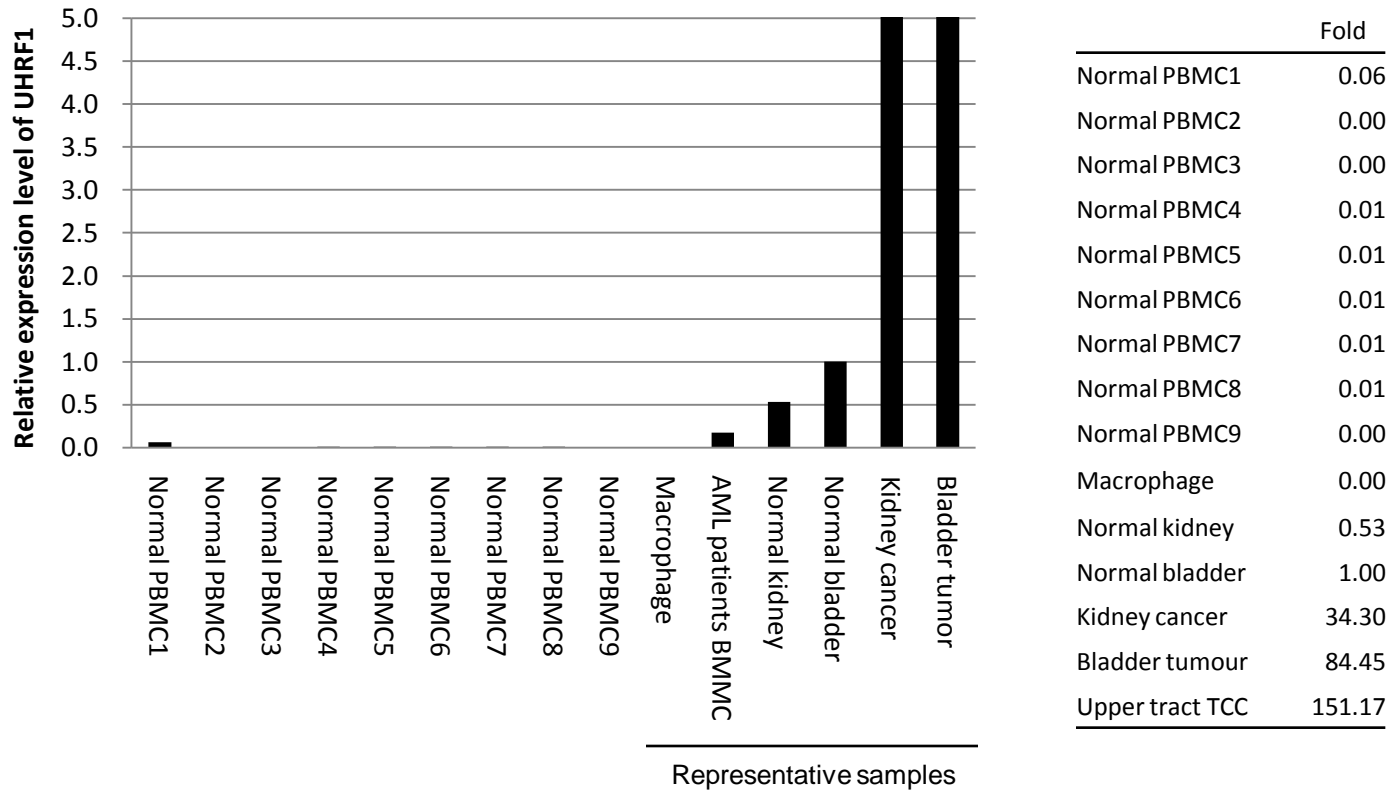

**Supplemental Figure 3** Relative expression levels of *UHRF1* in peripheral blood mononuclear cells (PBMCs) were examined by TaqMan qRT-PCR. Almost no expression of *UHRF1* was detected in PBMCs .
