# Supplementary material for: UHRF1 is a novel molecular marker for diagnosis and the prognosis of bladder cancer
Source: PubMed Central journal article supplement (PMC2713709; doi:10.1038/sj.bjc.6605123), 2009-06-02
Supplement: 6605123x4.pdf [file 6605123x4.pdf]

**Supplemental Table 1:** Clinical information of kidney tumour patients used for Figure 3B-D

| Patients ID | <sup>a</sup> UHRF1<br>Exp level | Type                         | Pathological<br>staging | Histological<br>grade | Status<br>after 5 years | Survival duration<br>(months) |
|-------------|---------------------------------|------------------------------|-------------------------|-----------------------|-------------------------|-------------------------------|
| R193T       | 0.098                           | Clear cell carcinoma         | pT1                     | 3                     | <sup>b</sup> NA         | NA                            |
| R69T        | 0.103                           | Clear cell carcinoma         | pT1                     | 2                     | Alive                   | 60                            |
| R251T       | 0.211                           | Clear cell carcinoma         | pT2                     | 3                     | NA                      | NA                            |
| R235T       | 0.260                           | Clear cell carcinoma         | pT1                     | 3                     | Alive                   | 60                            |
| R403T       | 0.262                           | Clear cell carcinoma         | NA                      | 1                     | NA                      | NA                            |
| R503T       | 0.264                           | Clear cell carcinoma         | NA                      | 1                     | NA                      | NA                            |
| R81T        | 0.279                           | Clear cell carcinoma         | NA                      | NA                    | NA                      | NA                            |
| R245T       | 0.331                           | Clear cell carcinoma         | NA                      | 2                     | NA                      | NA                            |
| R153T       | 0.370                           | Clear cell carcinoma         | NA                      | 2                     | Alive                   | 60                            |
| R517T       | 0.378                           | Clear cell carcinoma         | pT1                     | 2                     | Alive                   | 60                            |
| R309T       | 0.478                           | Clear cell carcinoma         | pT1                     | 2                     | Alive                   | 60                            |
| R177T       | 0.618                           | Chromophobe <sup>c</sup> RCC | pT1                     | NA                    | Alive                   | 60                            |
| R307T       | 0.735                           | Clear cell carcinoma         | pT2                     | 2                     | Alive                   | 60                            |
| R361T       | 0.745                           | Clear cell carcinoma         | pT2                     | 2                     | Alive                   | 60                            |
| R243T       | 0.804                           | papillary                    | pT1                     | NA                    | Alive                   | 60                            |
| R197T       | 0.862                           | Clear cell carcinoma         | pT1                     | 3                     | Alive                   | 60                            |
| R311T       | 0.886                           | Clear cell carcinoma         | pT2                     | 2                     | Alive                   | 60                            |
| R209T       | 1.004                           | Clear cell carcinoma         | pT2                     | 3                     | Dead                    | 17                            |
| R417T       | 1.018                           | Clear cell carcinoma         | NA                      | 2                     | NA                      | NA                            |
| R253T       | 1.018                           | Clear cell carcinoma         | pT3a                    | 2                     | Alive                   | 60                            |
| R233T       | 1.178                           | Clear cell carcinoma         | pT3a                    | 2                     | Alive                   | 60                            |
| R317T       | 1.186                           | Clear cell carcinoma         | pT1                     | 2                     | Alive                   | 60                            |
| R419T       | 1.228                           | Clear cell carcinoma         | pT2                     | 2                     | Alive                   | 60                            |
| R397T       | 1.236                           | Clear cell carcinoma         | pT2                     | 3                     | Dead                    | 14                            |
| R373T       | 1.900                           | Clear cell carcinoma         | NA                      | 2                     | NA                      | NA                            |
| R315T       | 2.051                           | Clear cell carcinoma         | pT3b                    | 3                     | Alive                   | 60                            |
| R423T       | 2.356                           | Clear cell carcinoma         | pT3a                    | 2                     | Alive                   | 60                            |
| R215T       | 2.372                           | Clear cell carcinoma         | NA                      | 3                     | NA                      | NA                            |
| R483T       | 2.596                           | Clear cell carcinoma         | pT4                     | 4                     | Alive                   | 60                            |
| R115T       | 2.725                           | Clear cell carcinoma         | pT1                     | 3                     | Alive                   | 60                            |
| R274T       | 2.982                           | Clear cell carcinoma         | pT3                     | 3                     | Dead                    | 0                             |
| R363T       | 3.023                           | Clear cell carcinoma         | pT2                     | 2                     | Alive                   | 60                            |
| R141T       | 3.108                           | Clear cell carcinoma         | pT1                     | 2                     | NA                      | NA                            |
| R327T       | 3.473                           | Clear cell carcinoma         | NA                      | 2                     | Dead                    | 40                            |
| R59T        | 3.800                           | Clear cell carcinoma         | pT1                     | 2                     | Alive                   | 60                            |
| R187T       | 3.934                           | Clear cell carcinoma         | pT2                     | 3                     | Alive                   | 60                            |
| R321T       | 4.217                           | Clear cell carcinoma         | pT1                     | 2                     | Dead                    | 18                            |
| R199T       | 4.777                           | Clear cell carcinoma         | pT2                     | 3                     | Dead                    | 10                            |
| R71T        | 5.449                           | Clear cell carcinoma         | pT1                     | 1                     | NA                      | NA                            |
| R524T       | 5.922                           | Clear cell carcinoma         | pT3b                    | 2                     | Alive                   | 60                            |
| R137T       | 5.922                           | Clear cell carcinoma         | pT1                     | 2                     | Alive                   | 60                            |
| R487T       | 6.617                           | Clear cell carcinoma         | pT2                     | 3                     | Alive                   | 60                            |
| R367T       | 7.923                           | Clear cell carcinoma         | pT2                     | 3                     | Alive                   | 60                            |
| R383T       | 8.034                           | Clear cell carcinoma         | pT4                     | 3                     | Dead                    | 18                            |

|       |        |                           |      |    |       |    |
|-------|--------|---------------------------|------|----|-------|----|
| R572T | 8.203  | Clear cell carcinoma      | pT3a | 2  | Alive | 60 |
| R61T  | 8.317  | Clear cell carcinoma      | NA   | 1  | NA    | NA |
| R49T  | 9.293  | Papillary RCC             | pT3a | NA | Dead  | 23 |
| R205T | 9.422  | Clear cell carcinoma      | pT1  | 3  | Dead  | 10 |
| R333T | 11.926 | Clear cell carcinoma      | pT3  | 4  | Dead  | 12 |
| R147T | 12.694 | Clear cell carcinoma      | pT2  | 3  | Dead  | 59 |
| R578T | 13.142 | Clear cell carcinoma      | pT3a | 2  | Dead  | 5  |
| R341T | 13.233 | Clear cell carcinoma      | pT2  | 2  | Dead  | 49 |
| R68T  | 13.891 | Clear cell carcinoma      | pT3a | 3  | Alive | 60 |
| R479T | 15.520 | Clear cell carcinoma      | pT1  | 2  | Dead  | 60 |
| R237T | 16.750 | Clear cell carcinoma      | pT3a | 2  | Alive | 60 |
| R532T | 18.077 | Clear cell carcinoma      | pT2  | 2  | Alive | 60 |
| R117T | 19.509 | Collecting duct carcinoma | NA   | NA | Dead  | 5  |
| R258T | 21.497 | Clear cell carcinoma      | NA   | 3  | NA    | NA |
| R31T  | 38.481 | Clear cell carcinoma      | pT2  | 4  | Alive | 60 |
| R371T | 38.749 | Clear cell carcinoma      | pT2  | 2  | Alive | 60 |
| R531T | 66.536 | Clear cell carcinoma      | pT2  | 3  | Alive | 60 |

<sup>a</sup>UHRF1 Exp level, Expression level of *UHRF1* at mRNA level in each bladder tumour from UK patients compared with average expression level of *UHRF1* in the 21 normal kidneys as 1.0. *β2-microglobulin* was used for normalization.

<sup>b</sup>NA, not available

<sup>c</sup>RCC, renal cell carcinoma

**Supplemental Table 2:** Clinical information of bladder cancer patients used for Figure 2A

| Patient ID | Sex | Age | Histology                   | Grade           | TNM classification | Source                | Slide ID or Catalog# | Lot#      |
|------------|-----|-----|-----------------------------|-----------------|--------------------|-----------------------|----------------------|-----------|
| Case 1     | F   | 72  | Transitional cell carcinoma | <sup>a</sup> I  | pTaN0M0            | <sup>b</sup> Iwate    | Iwate_IBT_1          | H08-00396 |
| Case 2     | F   | 51  | Transitional cell carcinoma | I-II            | T1N0M0             | <sup>c</sup> Biochain | Z7020105             | B110113   |
| Case 3     | M   | 45  | Transitional cell carcinoma | I-II            | T1N0M0             | Biochain              | Z7020105             | B110113   |
| Case 4     | M   | 51  | Transitional cell carcinoma | I-II            | T1N0M0             | Biochain              | Z7020105             | B110113   |
| Case 5     | F   | 70  | Transitional cell carcinoma | II-III          | T1N0M0             | Biochain              | Z7020105             | B110113   |
| Case 6     | F   | 53  | Transitional cell carcinoma | II-III          | T1N0M0             | Biochain              | Z7020105             | B110113   |
| Case 7     | M   | 61  | Transitional cell carcinoma | III             | T2N0M0             | Biochain              | Z7020105             | B110113   |
| Case 8     | F   | 37  | Transitional cell carcinoma | III             | T2N0M0             | Biochain              | Z7020105             | B110113   |
| Case 9     | F   | 44  | Transitional cell carcinoma | III             | T2N0M1             | Biochain              | Z7020105             | B110113   |
| Case 10    | M   | 55  | Transitional cell carcinoma | III             | T4N2MX             | Biochain              | Z7020105             | B110113   |
| Case 11    | M   | 64  | Papillary TCC               | <sup>a</sup> NA | NA                 | Biochain              | T2235010             | A710214   |
| Case 12    | M   | 76  | Adenocarcinoma              | II-III          | T2N0M0             | Biochain              | Z7020105             | B110113   |
| Case 13    | M   | 68  | Adenocarcinoma              | II-III          | T2N0M0             | Biochain              | Z7020105             | B110113   |

<sup>a</sup>NA, not available

<sup>b</sup>Iwate Medical University - 19-1 Uchimaru, Morioka 020-8505, JAPAN.

<sup>c</sup>BioChain Institute, Inc. - 3517 Breakwater Avenue, Hayward, CA 94545, USA

**Supplemental Table 3:** Information of normal tissues used for Figure 2B

| Sample ID      | Sex | Age | Histology | Anatomic site | Source                | Catalog# | Lot#    |
|----------------|-----|-----|-----------|---------------|-----------------------|----------|---------|
| Normal bladder | M   | 29  | Normal    | Bladder       | <sup>a</sup> Biochain | T2234010 | A805228 |
| Normal lung    | M   | 26  | Normal    | Lung          | Biochain              | T2234152 | B206127 |
| Normal liver   | M   | 20  | Normal    | Liver         | Biochain              | T2234149 | A907092 |
| Normal heart   | F   | 87  | Normal    | Heart         | Biochain              | T1234122 | B101020 |
| Normal kidney  | M   | 50  | Normal    | Kidney        | Biochain              | T2234142 | B112007 |

<sup>a</sup>BioChain Institute, Inc. - 3517 Breakwater Avenue, Hayward, CA 94545, USA

**Supplemental Table 4:** Clinical information of kidney cancer patients used for supplemental Figure 3A

| Patient ID | Sex | Age | Histology                   | Stage (TNM) | Source                | Catalog# | Lot#    |
|------------|-----|-----|-----------------------------|-------------|-----------------------|----------|---------|
| Case 1     | F   | 53  | Clear cell carcinoma        | T1N0M0      | <sup>a</sup> Biochain | Z7020053 | B110061 |
| Case 2     | M   | 58  | Clear cell carcinoma        | T1N0M0      | Biochain              | Z7020053 | B110061 |
| Case 3     | M   | 60  | Clear cell carcinoma        | T1N0M0      | Biochain              | Z7020053 | B110061 |
| Case 4     | M   | 56  | Clear cell carcinoma        | T1N0M0      | Biochain              | Z7020053 | B110061 |
| Case 5     | M   | 55  | Clear cell carcinoma        | T1N0M0      | Biochain              | Z7020053 | B110061 |
| Case 6     | M   | 67  | Clear cell carcinoma        | T1N0M0      | Biochain              | Z7020053 | B110061 |
| Case 7     | M   | 57  | Clear cell carcinoma        | T1N0M0      | Biochain              | Z7020053 | B110061 |
| Case 8     | F   | 56  | Clear cell carcinoma        | T2N0M0      | Biochain              | Z7020053 | B110061 |
| Case 9     | M   | 50  | Clear cell carcinoma        | T2N0M0      | Biochain              | Z7020053 | B110061 |
| Case 10    | M   | 63  | Papillary carcinoma         | T1N0M0      | Biochain              | Z7020053 | B110061 |
| Case 11    | F   | 29  | Papillary carcinoma         | T1N1M0      | Biochain              | Z7020053 | B110061 |
| Case 12    | M   | 71  | Transitional cell carcinoma | T1N0M0      | Biochain              | Z7020053 | B110061 |

<sup>a</sup>BioChain Institute, Inc. - 3517 Breakwater Avenue, Hayward, CA 94545, USA
